# Supplementary material for: Structure analysis of yeast glutaredoxin Grx6 protein produced in Escherichia coli
Source: PubMed Central journal article supplement (PMC6091153; doi:10.1186/s41021-018-0103-6), 2018-08-06

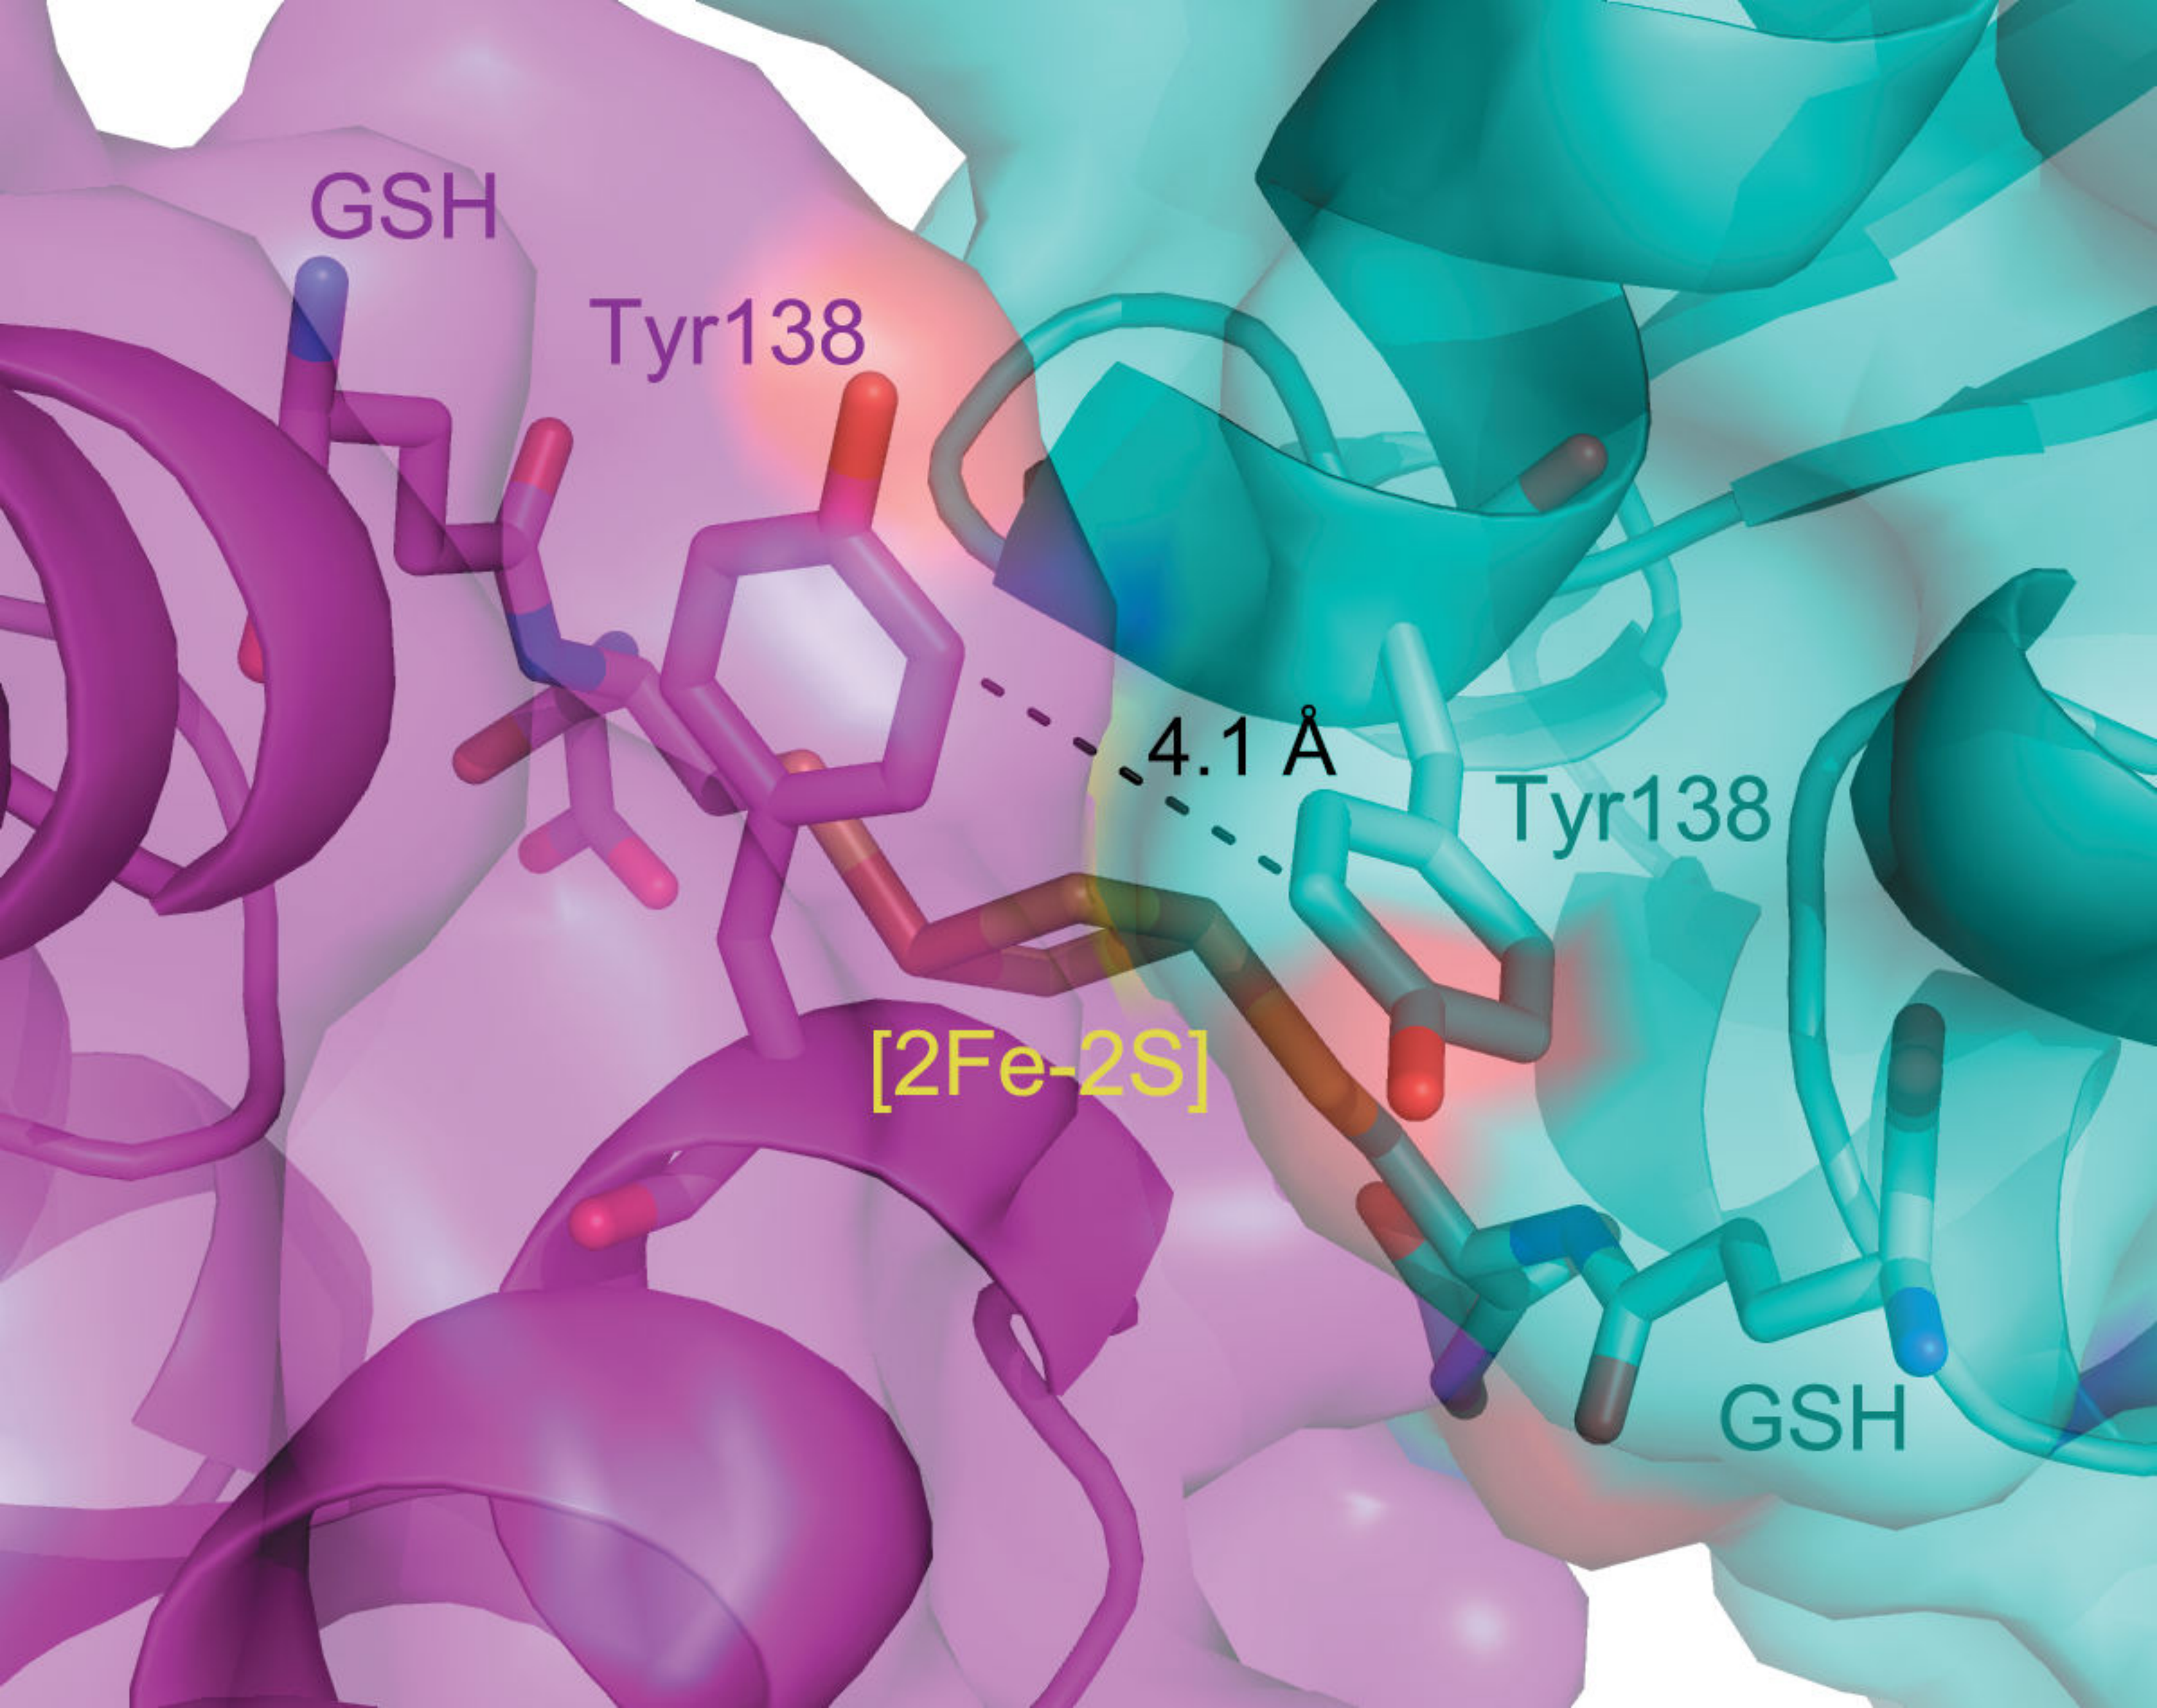

Supplement: 41021_2018_103_MOESM2_ESM.pdf [file 41021_2018_103_MOESM2_ESM.pdf]
